# Supplementary material for: A robust blind deconvolution method for noisy images
Source: Royal Society of Chemistry journal article supplement (doi:10.1039/c2dt30940h), 1999-01-01
Supplement: c2dt30940h.pdf [file c2dt30940h.pdf]

# **ELECTRONIC SUPPORTING INFORMATION**

## **Bioactive Cyclometalated Phthalimides: Design, Synthesis and Kinase Inhibition**

Sebastian Blanck,<sup>†</sup> Yann Geisselbrecht,<sup>†</sup> Katja Kräling,<sup>†</sup> Stephen Middel,<sup>†</sup> Thomas Mietke,<sup>†</sup> Klaus  
Harms,<sup>†</sup> Lars-Oliver Essen<sup>†</sup> and Eric Meggers<sup>\*,†,§</sup>

<sup>†</sup> Fachbereich Chemie, Philipps-Universität Marburg, Hans-Meerwein-Straße, 35043 Marburg,  
Germany

<sup>§</sup> Department of Chemical Biology, College of Chemistry and Chemical Engineering, Xiamen  
University, Xiamen 361005, P.R. China

\* Email: [meggers@chemie.uni-marburg.de](mailto:meggers@chemie.uni-marburg.de)

## Table of Contents

|                                                                                                       |     |
|-------------------------------------------------------------------------------------------------------|-----|
| 1. Synthesis of the Phthalimides <b>1a</b> and <b>1b</b>                                              | S3  |
| 2. Crystal Structure of <i>N</i> -( <i>tert</i> -Butyldimethylsilyl)-4-bromophthalimide ( <b>1b</b> ) | S5  |
| 3. Supplementary Kinase Inhibition Data of Complexes <b>8b</b> and <b>9b</b>                          | S7  |
| 4. References                                                                                         | S25 |

## 1. Synthesis of the Phthalimides **1b** and **1c**

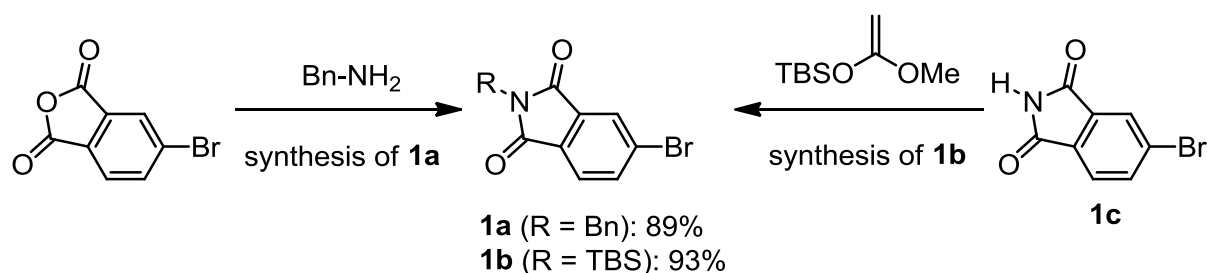

**Scheme S1.** Synthesis of *N*-(benzyl)-4-bromophthalimide (**1a**) and *N*-(*tert*-butyldimethylsilyl)-4-bromophthalimide (**1b**).

***N*-(Benzyl)-4-bromophthalimide (1a).** 4-Bromo phthalic anhydride<sup>1</sup> (5.00 g, 22.0 mmol) was dissolved in 50 mL glacial acetic acid. Benzylamine (2.40 mL, 22.0 mmol) was added and the solution was heated to 130 °C for 4 h. The hot solution was carefully poured into 200 mL ice-cold water, the resulting solid filtered off, and washed with 100 mL water. *N*-Benzyl-4-bromophthalimide (**1a**) was obtained as beige solid (6.22 g, 89%). <sup>1</sup>H-NMR (300 MHz, CDCl<sub>3</sub>): δ (ppm) 7.97 (dd, *J* = 1.6, 0.3 Hz, 1H), 7.84 (dd, *J* = 7.9, 1.7 Hz, 1H), 7.69-7.72 (m, 1H), 7.40-7.43 (m, 2H), 7.27-7.35 (m, 3H), 4.83 (s, 2H). <sup>13</sup>C-NMR (75 MHz, CDCl<sub>3</sub>): δ (ppm) 167.2, 166.7, 137.0, 136.0, 133.7, 130.6, 128.9, 128.7, 128.6, 128.0, 126.7, 124.7, 41.8. IR (film): ν (cm<sup>-1</sup>) 3065, 3033, 1772, 1710, 1607, 1430, 1418, 1387, 1345, 1186, 1170, 1102, 1068, 942, 739, 714, 398. HRMS calcd for C<sub>15</sub>H<sub>11</sub>BrNO<sub>2</sub> (M+H)<sup>+</sup> 317.9949, found 317.9950.

***N*-(*tert*-Butyldimethylsilyl)-4-bromophthalimide (1b).** 4-Bromophthalimide (**1c**)<sup>1</sup> (4.00 g, 17.7 mmol) was suspended in 100 mL MeCN, (*tert*-butyldimethylsilyl)-methoxyethene<sup>2</sup> (6.16 mL, 28.3 mmol) was added, and the suspension heated to reflux for 5 h. The solvent was removed and the crude product subjected to silica gel chromatography with CH<sub>2</sub>Cl<sub>2</sub>. The combined product eluents were dried *in vacuo* and *N*-(*tert*-butyldimethylsilyl)-4-bromophthalimide (**1b**) was obtained as white solid (5.59 g, 93%) <sup>1</sup>H-NMR (300 MHz, CDCl<sub>3</sub>): δ (ppm) 7.93 (d, *J* = 0.9 Hz, 1H), 7.83 (dd, *J* = 8.1, 0.9 Hz, 1H), 7.67 (d, *J* = 8.1 Hz,

<sup>1</sup>H) 0.97 (s, 9H), 0.51 (s, 6H). <sup>13</sup>C-NMR (75 MHz, CDCl<sub>3</sub>): δ (ppm) 172.8, 172.3, 136.9, 135.7, 132.6, 128.8, 126.4, 124.4, 26.3, 19.0, -4.3. IR (film): ν (cm<sup>-1</sup>) 2955, 2932, 2857, 1757, 1700, 1599, 1464, 1414, 1331, 1293, 1255, 1167, 1068, 885, 834, 792, 746, 705, 672. HRMS calcd for C<sub>14</sub>H<sub>19</sub>BrNO<sub>2</sub>Si (M+H)<sup>+</sup> 340.0363, found 340.0365.

## 2. Crystal Structure of *N*-(*tert*-Butyldimethylsilyl)-4-bromophthalimide (**1b**)

Single crystals of *N*-(*tert*-butyldimethylsilyl)-4-bromophthalimide (**1b**) were obtained by slow evaporation of CH<sub>2</sub>Cl<sub>2</sub> at 23 °C. The intensity data set was collected at 100 K using a STOE IPDS2 system. The data was corrected for absorption effects using multi scanned reflections.<sup>3</sup> The structure was solved using direct (SIR2008)<sup>4</sup> and refined using the full matrix least squares procedure implemented in SHELX-97.<sup>5</sup> One of the two independent molecules in the asymmetric unit showed positional disorder of the Br atom. Hydrogen atoms were included at calculated positions.

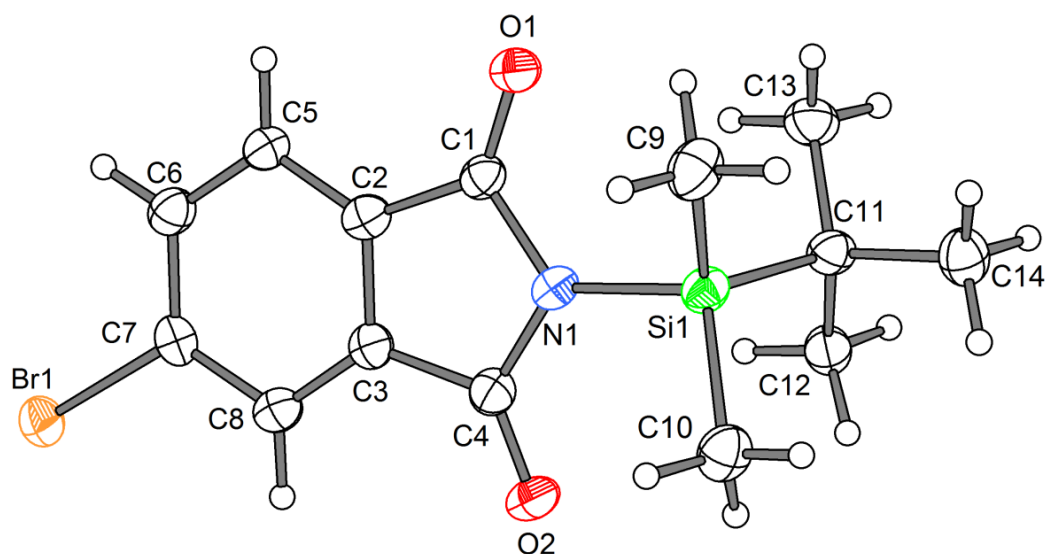

**Figure S1.** Crystal structure of *N*-(*tert*-butyldimethylsilyl)-4-bromophthalimide (**1b**). ORTEP drawing with 50% probability thermal ellipsoids.

**Table S1.** Crystallographic data for **1b**.<sup>a</sup>

|                                         |                                                      |
|-----------------------------------------|------------------------------------------------------|
| formula                                 | C <sub>14</sub> H <sub>18</sub> BrNO <sub>2</sub> Si |
| fw                                      | 340.29                                               |
| a(Å)                                    | 16.9037(7)                                           |
| b(Å)                                    | 13.2574(3)                                           |
| c(Å)                                    | 14.3409(6)                                           |
| α(°)                                    | 90                                                   |
| β(°)                                    | 108.001(3)                                           |
| γ(°)                                    | 90                                                   |
| V(Å <sup>3</sup> )                      | 3056.5(2)                                            |
| Z                                       | 8                                                    |
| space group                             | P2 <sub>1</sub> /c                                   |
| d <sub>calcd</sub> (Mg/m <sup>3</sup> ) | 1.479                                                |
| μ(mm <sup>-1</sup> )                    | 2.766                                                |
| θ range(°)                              | 1.27 – 26.74                                         |
| no. of indep.<br>reflections            | 6471                                                 |
| no. of parameters                       | 362                                                  |
| wR2 (all data) <sup>b</sup>             | 0.0752                                               |
| R1 (I > 2σ(I)) <sup>b</sup>             | 0.0364                                               |
| CCDC no. <sup>c</sup>                   | 861338                                               |

<sup>a</sup> MoKα radiation (λ = 0.71073 Å). <sup>b</sup> R1 = Σ||F<sub>o</sub>| - |F<sub>c</sub>||/Σ|F<sub>o</sub>|; wR2=[w(F<sub>o</sub><sup>2</sup> - F<sub>c</sub><sup>2</sup>)<sup>2</sup>/ Σw(F<sub>o</sub><sup>2</sup>)<sup>2</sup>]<sup>1/2</sup>.

<sup>c</sup> Crystallographic data (excluding structure factors) have been deposited in the Cambridge Crystallographic Data Center. A CIF file can be obtained from the CCDC free of charge via [http://www.ccdc.cam.ac.uk/data\\_request/cif](http://www.ccdc.cam.ac.uk/data_request/cif).

### 3. Supplementary Kinase Inhibition Data

The protein kinase selectivity profile of racemic complexes **8b** and **9b** at an assay concentration of 10  $\mu$ M was derived from an active-site-directed affinity screening against 442 human protein kinases (KINOMEscan, DiscoverRx).<sup>6,7</sup>

**Table S2.** KINOMEscan Screening Data for Complex **8b** (DiscoverRx).

| Ambit Gene Symbol             | Entrez Gene Symbol | Percent Control |
|-------------------------------|--------------------|-----------------|
| AAK1                          | AAK1               | 91              |
| ABL1(E255K)-phosphorylated    | ABL1               | 16              |
| ABL1(F317I)-nonphosphorylated | ABL1               | 100             |
| ABL1(F317I)-phosphorylated    | ABL1               | 71              |
| ABL1(F317L)-nonphosphorylated | ABL1               | 48              |
| ABL1(F317L)-phosphorylated    | ABL1               | 23              |
| ABL1(H396P)-nonphosphorylated | ABL1               | 3.3             |
| ABL1(H396P)-phosphorylated    | ABL1               | 27              |
| ABL1(M351T)-phosphorylated    | ABL1               | 28              |
| ABL1(Q252H)-nonphosphorylated | ABL1               | 13              |
| ABL1(Q252H)-phosphorylated    | ABL1               | 54              |
| ABL1(T315I)-nonphosphorylated | ABL1               | 3.1             |
| ABL1(T315I)-phosphorylated    | ABL1               | 1.6             |
| ABL1(Y253F)-phosphorylated    | ABL1               | 40              |
| ABL1-nonphosphorylated        | ABL1               | 27              |
| ABL1-phosphorylated           | ABL1               | 35              |
| ABL2                          | ABL2               | 67              |
| ACVR1                         | ACVR1              | 100             |
| ACVR1B                        | ACVR1B             | 95              |
| ACVR2A                        | ACVR2A             | 100             |
| ACVR2B                        | ACVR2B             | 93              |
| ACVRL1                        | ACVRL1             | 100             |
| ADCK3                         | CABC1              | 88              |
| ADCK4                         | ADCK4              | 90              |
| AKT1                          | AKT1               | 0.7             |
| AKT2                          | AKT2               | 35              |
| AKT3                          | AKT3               | 8.7             |
| ALK                           | ALK                | 30              |
| AMPK-alpha1                   | PRKAA1             | 1.4             |
| AMPK-alpha2                   | PRKAA2             | 7.4             |
| ANKK1                         | ANKK1              | 100             |
| ARK5                          | NUAK1              | 16              |
| ASK1                          | MAP3K5             | 100             |
| ASK2                          | MAP3K6             | 63              |
| AURKA                         | AURKA              | 23              |
| AURKB                         | AURKB              | 16              |
| AURKC                         | AURKC              | 31              |

|               |          |      |
|---------------|----------|------|
| AXL           | AXL      | 8.3  |
| BIKE          | BMP2K    | 62   |
| BLK           | BLK      | 1.2  |
| BMPR1A        | BMPR1A   | 98   |
| BMPR1B        | BMPR1B   | 100  |
| BMPR2         | BMPR2    | 15   |
| BMX           | BMX      | 76   |
| BRAF          | BRAF     | 100  |
| BRAF(V600E)   | BRAF     | 100  |
| BRK           | PTK6     | 100  |
| BRSK1         | BRSK1    | 100  |
| BRSK2         | BRSK2    | 100  |
| BTK           | BTK      | 0.1  |
| CAMK1         | CAMK1    | 41   |
| CAMK1D        | CAMK1D   | 2.3  |
| CAMK1G        | CAMK1G   | 45   |
| CAMK2A        | CAMK2A   | 30   |
| CAMK2B        | CAMK2B   | 35   |
| CAMK2D        | CAMK2D   | 65   |
| CAMK2G        | CAMK2G   | 43   |
| CAMK4         | CAMK4    | 1.3  |
| CAMKK1        | CAMKK1   | 0.9  |
| CAMKK2        | CAMKK2   | 0.95 |
| CASK          | CASK     | 100  |
| CDC2L1        | CDC2L1   | 100  |
| CDC2L2        | CDC2L2   | 100  |
| CDC2L5        | CDC2L5   | 100  |
| CDK11         | CDC2L6   | 98   |
| CDK2          | CDK2     | 32   |
| CDK3          | CDK3     | 72   |
| CDK4-cyclinD1 | CDK4     | 100  |
| CDK4-cyclinD3 | CDK4     | 99   |
| CDK5          | CDK5     | 100  |
| CDK7          | CDK7     | 7    |
| CDK8          | CDK8     | 100  |
| CDK9          | CDK9     | 100  |
| CDKL1         | CDKL1    | 100  |
| CDKL2         | CDKL2    | 100  |
| CDKL3         | CDKL3    | 100  |
| CDKL5         | CDKL5    | 100  |
| CHEK1         | CHEK1    | 41   |
| CHEK2         | CHEK2    | 2    |
| CIT           | CIT      | 100  |
| CLK1          | CLK1     | 38   |
| CLK2          | CLK2     | 1.4  |
| CLK3          | CLK3     | 5.2  |
| CLK4          | CLK4     | 84   |
| CSF1R         | CSF1R    | 71   |
| CSK           | CSK      | 77   |
| CSNK1A1       | CSNK1A1  | 100  |
| CSNK1A1L      | CSNK1A1L | 100  |



|                           |          |     |
|---------------------------|----------|-----|
| CSNK1D                    | CSNK1D   | 100 |
| CSNK1E                    | CSNK1E   | 92  |
| CSNK1G1                   | CSNK1G1  | 100 |
| CSNK1G2                   | CSNK1G2  | 100 |
| CSNK1G3                   | CSNK1G3  | 100 |
| CSNK2A1                   | CSNK2A1  | 98  |
| CSNK2A2                   | CSNK2A2  | 80  |
| CTK                       | MATK     | 93  |
| DAPK1                     | DAPK1    | 61  |
| DAPK2                     | DAPK2    | 76  |
| DAPK3                     | DAPK3    | 68  |
| DCAMKL1                   | DCLK1    | 7.8 |
| DCAMKL2                   | DCLK2    | 4   |
| DCAMKL3                   | DCLK3    | 25  |
| DDR1                      | DDR1     | 53  |
| DDR2                      | DDR2     | 53  |
| DLK                       | MAP3K12  | 54  |
| DMPK                      | DMPK     | 73  |
| DMPK2                     | CDC42BPG | 60  |
| DRAK1                     | STK17A   | 100 |
| DRAK2                     | STK17B   | 100 |
| DYRK1A                    | DYRK1A   | 82  |
| DYRK1B                    | DYRK1B   | 82  |
| DYRK2                     | DYRK2    | 100 |
| EGFR                      | EGFR     | 100 |
| EGFR(E746-A750del)        | EGFR     | 100 |
| EGFR(G719C)               | EGFR     | 100 |
| EGFR(G719S)               | EGFR     | 100 |
| EGFR(L747-E749del, A750P) | EGFR     | 92  |
| EGFR(L747-S752del, P753S) | EGFR     | 100 |
| EGFR(L747-T751del,Sins)   | EGFR     | 100 |
| EGFR(L858R)               | EGFR     | 100 |
| EGFR(L858R,T790M)         | EGFR     | 65  |
| EGFR(L861Q)               | EGFR     | 84  |
| EGFR(S752-I759del)        | EGFR     | 100 |
| EGFR(T790M)               | EGFR     | 24  |
| EIF2AK1                   | EIF2AK1  | 100 |
| EPHA1                     | EPHA1    | 100 |
| EPHA2                     | EPHA2    | 93  |
| EPHA3                     | EPHA3    | 29  |
| EPHA4                     | EPHA4    | 79  |
| EPHA5                     | EPHA5    | 94  |
| EPHA6                     | EPHA6    | 74  |
| EPHA7                     | EPHA7    | 89  |
| EPHA8                     | EPHA8    | 65  |
| EPHB1                     | EPHB1    | 100 |
| EPHB2                     | EPHB2    | 100 |
| EPHB3                     | EPHB3    | 84  |
| EPHB4                     | EPHB4    | 100 |
| EPHB6                     | EPHB6    | 76  |
| ERBB2                     | ERBB2    | 84  |

|                       |         |     |
|-----------------------|---------|-----|
| ERBB3                 | ERBB3   | 100 |
| ERBB4                 | ERBB4   | 95  |
| ERK1                  | MAPK3   | 15  |
| ERK2                  | MAPK1   | 19  |
| ERK3                  | MAPK6   | 95  |
| ERK4                  | MAPK4   | 100 |
| ERK5                  | MAPK7   | 2.5 |
| ERK8                  | MAPK15  | 49  |
| ERN1                  | ERN1    | 64  |
| FAK                   | PTK2    | 8.5 |
| FER                   | FER     | 2.9 |
| FES                   | FES     | 54  |
| FGFR1                 | FGFR1   | 12  |
| FGFR2                 | FGFR2   | 30  |
| FGFR3                 | FGFR3   | 47  |
| FGFR3(G697C)          | FGFR3   | 54  |
| FGFR4                 | FGFR4   | 29  |
| FGR                   | FGR     | 24  |
| FLT1                  | FLT1    | 86  |
| FLT3                  | FLT3    | 29  |
| FLT3(D835H)           | FLT3    | 12  |
| FLT3(D835Y)           | FLT3    | 50  |
| FLT3(ITD)             | FLT3    | 44  |
| FLT3(K663Q)           | FLT3    | 12  |
| FLT3(N841I)           | FLT3    | 2.7 |
| FLT3(R834Q)           | FLT3    | 18  |
| FLT4                  | FLT4    | 66  |
| FRK                   | FRK     | 36  |
| FYN                   | FYN     | 23  |
| GAK                   | GAK     | 5.6 |
| GCN2(Kin.Dom.2,S808G) | EIF2AK4 | 98  |
| GRK1                  | GRK1    | 1.6 |
| GRK4                  | GRK4    | 100 |
| GRK7                  | GRK7    | 1   |
| GSK3A                 | GSK3A   | 3.6 |
| GSK3B                 | GSK3B   | 1.2 |
| HCK                   | HCK     | 22  |
| HIPK1                 | HIPK1   | 88  |
| HIPK2                 | HIPK2   | 45  |
| HIPK3                 | HIPK3   | 65  |
| HIPK4                 | HIPK4   | 100 |
| HPK1                  | MAP4K1  | 38  |
| HUNK                  | HUNK    | 100 |
| ICK                   | ICK     | 4.9 |
| IGF1R                 | IGF1R   | 16  |
| IKK-alpha             | CHUK    | 100 |
| IKK-beta              | IKBKB   | 100 |
| IKK-epsilon           | IKBKE   | 100 |
| INSR                  | INSR    | 11  |
| INSRR                 | INSRR   | 26  |
| IRAK1                 | IRAK1   | 78  |

|                              |          |      |
|------------------------------|----------|------|
| IRAK3                        | IRAK3    | 51   |
| IRAK4                        | IRAK4    | 1.3  |
| ITK                          | ITK      | 14   |
| JAK1(JH1domain-catalytic)    | JAK1     | 95   |
| JAK1(JH2domain-pseudokinase) | JAK1     | 73   |
| JAK2(JH1domain-catalytic)    | JAK2     | 31   |
| JAK3(JH1domain-catalytic)    | JAK3     | 4.8  |
| JNK1                         | MAPK8    | 100  |
| JNK2                         | MAPK9    | 100  |
| JNK3                         | MAPK10   | 75   |
| KIT                          | KIT      | 64   |
| KIT(A829P)                   | KIT      | 63   |
| KIT(D816H)                   | KIT      | 92   |
| KIT(D816V)                   | KIT      | 73   |
| KIT(L576P)                   | KIT      | 42   |
| KIT(V559D)                   | KIT      | 62   |
| KIT(V559D,T670I)             | KIT      | 87   |
| KIT(V559D,V654A)             | KIT      | 87   |
| LATS1                        | LATS1    | 74   |
| LATS2                        | LATS2    | 7.4  |
| LCK                          | LCK      | 3.8  |
| LIMK1                        | LIMK1    | 92   |
| LIMK2                        | LIMK2    | 100  |
| LKB1                         | STK11    | 81   |
| LOK                          | STK10    | 65   |
| LRRK2                        | LRRK2    | 100  |
| LRRK2(G2019S)                | LRRK2    | 78   |
| LTK                          | LTK      | 5.8  |
| LYN                          | LYN      | 49   |
| LZK                          | MAP3K13  | 46   |
| MAK                          | MAK      | 100  |
| MAP3K1                       | MAP3K1   | 71   |
| MAP3K15                      | MAP3K15  | 100  |
| MAP3K2                       | MAP3K2   | 28   |
| MAP3K3                       | MAP3K3   | 17   |
| MAP3K4                       | MAP3K4   | 100  |
| MAP4K2                       | MAP4K2   | 100  |
| MAP4K3                       | MAP4K3   | 0.85 |
| MAP4K4                       | MAP4K4   | 76   |
| MAP4K5                       | MAP4K5   | 9    |
| MAPKAPK2                     | MAPKAPK2 | 100  |
| MAPKAPK5                     | MAPKAPK5 | 100  |
| MARK1                        | MARK1    | 42   |
| MARK2                        | MARK2    | 4.8  |
| MARK3                        | MARK3    | 24   |
| MARK4                        | MARK4    | 47   |
| MAST1                        | MAST1    | 81   |
| MEK1                         | MAP2K1   | 5.2  |
| MEK2                         | MAP2K2   | 10   |
| MEK3                         | MAP2K3   | 0    |
| MEK4                         | MAP2K4   | 5.8  |

|             |          |     |
|-------------|----------|-----|
| MEK5        | MAP2K5   | 5.8 |
| MEK6        | MAP2K6   | 85  |
| MELK        | MELK     | 100 |
| MERTK       | MERTK    | 5.4 |
| MET         | MET      | 33  |
| MET(M1250T) | MET      | 16  |
| MET(Y1235D) | MET      | 31  |
| MINK        | MINK1    | 12  |
| MKK7        | MAP2K7   | 14  |
| MKNK1       | MKNK1    | 100 |
| MKNK2       | MKNK2    | 0.6 |
| MLCK        | MYLK3    | 99  |
| MLK1        | MAP3K9   | 29  |
| MLK2        | MAP3K10  | 66  |
| MLK3        | MAP3K11  | 26  |
| MRCKA       | CDC42BPA | 78  |
| MRCKB       | CDC42BPB | 46  |
| MST1        | STK4     | 4.9 |
| MST1R       | MST1R    | 64  |
| MST2        | STK3     | 50  |
| MST3        | STK24    | 3   |
| MST4        | MST4     | 0.2 |
| MTOR        | FRAP1    | 100 |
| MUSK        | MUSK     | 100 |
| MYLK        | MYLK     | 15  |
| MYLK2       | MYLK2    | 100 |
| MYLK4       | MYLK4    | 85  |
| MYO3A       | MYO3A    | 2.1 |
| MYO3B       | MYO3B    | 23  |
| NDR1        | STK38    | 7.8 |
| NDR2        | STK38L   | 14  |
| NEK1        | NEK1     | 74  |
| NEK11       | NEK11    | 100 |
| NEK2        | NEK2     | 63  |
| NEK3        | NEK3     | 56  |
| NEK4        | NEK4     | 100 |
| NEK5        | NEK5     | 95  |
| NEK6        | NEK6     | 100 |
| NEK7        | NEK7     | 100 |
| NEK9        | NEK9     | 100 |
| NIM1        | MGC42105 | 100 |
| NLK         | NLK      | 77  |
| OSR1        | OXR1     | 30  |
| p38-alpha   | MAPK14   | 99  |
| p38-beta    | MAPK11   | 72  |
| p38-delta   | MAPK13   | 54  |
| p38-gamma   | MAPK12   | 70  |
| PAK1        | PAK1     | 0.8 |
| PAK2        | PAK2     | 12  |
| PAK3        | PAK3     | 25  |
| PAK4        | PAK4     | 14  |

|                       |             |      |
|-----------------------|-------------|------|
| PAK6                  | PAK6        | 13   |
| PAK7                  | PAK7        | 0.55 |
| PCTK1                 | PCTK1       | 17   |
| PCTK2                 | PCTK2       | 52   |
| PCTK3                 | PCTK3       | 100  |
| PDGFRA                | PDGFRA      | 79   |
| PDGFRB                | PDGFRB      | 39   |
| PDPK1                 | PDPK1       | 62   |
| PFCDPK1(P.falciparum) | PFB0815w    | 100  |
| PFPK5(P.falciparum)   | MAL13P1.279 | 37   |
| PFTAIRE2              | PFTK2       | 4.4  |
| PFTK1                 | PFTK1       | 39   |
| PHKG1                 | PHKG1       | 75   |
| PHKG2                 | PHKG2       | 7.8  |
| PIK3C2B               | PIK3C2B     | 100  |
| PIK3C2G               | PIK3C2G     | 100  |
| PIK3CA                | PIK3CA      | 100  |
| PIK3CA(C420R)         | PIK3CA      | 100  |
| PIK3CA(E542K)         | PIK3CA      | 97   |
| PIK3CA(E545A)         | PIK3CA      | 88   |
| PIK3CA(E545K)         | PIK3CA      | 100  |
| PIK3CA(H1047L)        | PIK3CA      | 100  |
| PIK3CA(H1047Y)        | PIK3CA      | 100  |
| PIK3CA(I800L)         | PIK3CA      | 73   |
| PIK3CA(M1043I)        | PIK3CA      | 100  |
| PIK3CA(Q546K)         | PIK3CA      | 100  |
| PIK3CB                | PIK3CB      | 84   |
| PIK3CD                | PIK3CD      | 93   |
| PIK3CG                | PIK3CG      | 77   |
| PIK4CB                | PI4KB       | 4.7  |
| PIM1                  | PIM1        | 22   |
| PIM2                  | PIM2        | 79   |
| PIM3                  | PIM3        | 39   |
| PIP5K1A               | PIP5K1A     | 100  |
| PIP5K1C               | PIP5K1C     | 49   |
| PIP5K2B               | PIP4K2B     | 100  |
| PIP5K2C               | PIP4K2C     | 100  |
| PKAC-alpha            | PRKACA      | 1.4  |
| PKAC-beta             | PRKACB      | 2    |
| PKMYT1                | PKMYT1      | 58   |
| PKN1                  | PKN1        | 4.3  |
| PKN2                  | PKN2        | 35   |
| PKNB(M.tuberculosis)  | pknB        | 38   |
| PLK1                  | PLK1        | 97   |
| PLK2                  | PLK2        | 100  |
| PLK3                  | PLK3        | 72   |
| PLK4                  | PLK4        | 0.95 |
| PRKCD                 | PRKCD       | 85   |
| PRKCE                 | PRKCE       | 4.4  |
| PRKCH                 | PRKCH       | 40   |
| PRKCI                 | PRKCI       | 31   |

|                               |          |     |
|-------------------------------|----------|-----|
| PRKCQ                         | PRKCQ    | 1   |
| PRKD1                         | PRKD1    | 58  |
| PRKD2                         | PRKD2    | 67  |
| PRKD3                         | PRKD3    | 25  |
| PRKG1                         | PRKG1    | 53  |
| PRKG2                         | PRKG2    | 100 |
| PRKR                          | EIF2AK2  | 58  |
| PRKX                          | PRKX     | 21  |
| PRP4                          | PRPF4B   | 100 |
| PYK2                          | PTK2B    | 32  |
| QSK                           | KIAA0999 | 100 |
| RAF1                          | RAF1     | 77  |
| RET                           | RET      | 2.4 |
| RET(M918T)                    | RET      | 2   |
| RET(V804L)                    | RET      | 4.8 |
| RET(V804M)                    | RET      | 6.9 |
| RIOK1                         | RIOK1    | 65  |
| RIOK2                         | RIOK2    | 100 |
| RIOK3                         | RIOK3    | 98  |
| RIPK1                         | RIPK1    | 100 |
| RIPK2                         | RIPK2    | 100 |
| RIPK4                         | RIPK4    | 100 |
| RIPK5                         | DSTKY    | 5.4 |
| ROCK1                         | ROCK1    | 1.4 |
| ROCK2                         | ROCK2    | 3.6 |
| ROS1                          | ROS1     | 90  |
| RPS6KA4(Kin.Dom.1-N-terminal) | RPS6KA4  | 2.8 |
| RPS6KA4(Kin.Dom.2-C-terminal) | RPS6KA4  | 100 |
| RPS6KA5(Kin.Dom.1-N-terminal) | RPS6KA5  | 17  |
| RPS6KA5(Kin.Dom.2-C-terminal) | RPS6KA5  | 100 |
| RSK1(Kin.Dom.1-N-terminal)    | RPS6KA1  | 7.2 |
| RSK1(Kin.Dom.2-C-terminal)    | RPS6KA1  | 3.9 |
| RSK2(Kin.Dom.1-N-terminal)    | RPS6KA3  | 0.3 |
| RSK3(Kin.Dom.1-N-terminal)    | RPS6KA2  | 4.4 |
| RSK3(Kin.Dom.2-C-terminal)    | RPS6KA2  | 51  |
| RSK4(Kin.Dom.1-N-terminal)    | RPS6KA6  | 3   |
| RSK4(Kin.Dom.2-C-terminal)    | RPS6KA6  | 14  |
| S6K1                          | RPS6KB1  | 11  |
| SBK1                          | SBK1     | 100 |
| SgK110                        |          | 100 |
| SGK3                          | SGK3     | 44  |
| SIK                           | SIK1     | 29  |
| SIK2                          | SIK2     | 66  |
| SLK                           | SLK      | 34  |
| SNARK                         | NUAK2    | 13  |
| SNRK                          | SNRK     | 100 |
| SRC                           | SRC      | 2   |
| SRMS                          | SRMS     | 60  |
| SRPK1                         | SRPK1    | 100 |
| SRPK2                         | SRPK2    | 100 |
| SRPK3                         | SRPK3    | 100 |

|                              |        |      |
|------------------------------|--------|------|
| STK16                        | STK16  | 60   |
| STK33                        | STK33  | 9    |
| STK35                        | STK35  | 36   |
| STK36                        | STK36  | 84   |
| STK39                        | STK39  | 98   |
| SYK                          | SYK    | 100  |
| TAK1                         | MAP3K7 | 69   |
| TAOK1                        | TAOK1  | 11   |
| TAOK2                        | TAOK2  | 76   |
| TAOK3                        | TAOK3  | 60   |
| TBK1                         | TBK1   | 45   |
| TEC                          | TEC    | 19   |
| TESK1                        | TESK1  | 100  |
| TGFBR1                       | TGFBR1 | 100  |
| TGFBR2                       | TGFBR2 | 100  |
| TIE1                         | TIE1   | 46   |
| TIE2                         | TEK    | 51   |
| TLK1                         | TLK1   | 31   |
| TLK2                         | TLK2   | 81   |
| TNIK                         | TNIK   | 12   |
| TNK1                         | TNK1   | 56   |
| TNK2                         | TNK2   | 50   |
| TNNI3K                       | TNNI3K | 86   |
| TRKA                         | NTRK1  | 0.25 |
| TRKB                         | NTRK2  | 1.4  |
| TRKC                         | NTRK3  | 2.3  |
| TRPM6                        | TRPM6  | 75   |
| TSSK1B                       | TSSK1B | 100  |
| TTK                          | TTK    | 64   |
| TXK                          | TXK    | 90   |
| TYK2(JH1domain-catalytic)    | TYK2   | 9.4  |
| TYK2(JH2domain-pseudokinase) | TYK2   | 100  |
| TYRO3                        | TYRO3  | 84   |
| ULK1                         | ULK1   | 11   |
| ULK2                         | ULK2   | 4.3  |
| ULK3                         | ULK3   | 0.3  |
| VEGFR2                       | KDR    | 69   |
| VRK2                         | VRK2   | 0.75 |
| WEE1                         | WEE1   | 100  |
| WEE2                         | WEE2   | 67   |
| YANK1                        | STK32A | 21   |
| YANK2                        | STK32B | 44   |
| YANK3                        | STK32C | 65   |
| YES                          | YES1   | 13   |
| YSK1                         | STK25  | 28   |
| YSK4                         | YSK4   | 52   |
| ZAK                          | ZAK    | 100  |
| ZAP70                        | ZAP70  | 85   |

---

**Table S3.** KINOMEscan Screening Data for Complex **9b** (DiscoverX).

| Ambit Gene Symbol             | Entrez Gene Symbol | Percent Control |
|-------------------------------|--------------------|-----------------|
| AAK1                          | AAK1               | 79              |
| ABL1(E255K)-phosphorylated    | ABL1               | 100             |
| ABL1(F317I)-nonphosphorylated | ABL1               | 100             |
| ABL1(F317I)-phosphorylated    | ABL1               | 100             |
| ABL1(F317L)-nonphosphorylated | ABL1               | 100             |
| ABL1(F317L)-phosphorylated    | ABL1               | 100             |
| ABL1(H396P)-nonphosphorylated | ABL1               | 100             |
| ABL1(H396P)-phosphorylated    | ABL1               | 100             |
| ABL1(M351T)-phosphorylated    | ABL1               | 100             |
| ABL1(Q252H)-nonphosphorylated | ABL1               | 100             |
| ABL1(Q252H)-phosphorylated    | ABL1               | 100             |
| ABL1(T315I)-nonphosphorylated | ABL1               | 100             |
| ABL1(T315I)-phosphorylated    | ABL1               | 71              |
| ABL1(Y253F)-phosphorylated    | ABL1               | 90              |
| ABL1-nonphosphorylated        | ABL1               | 100             |
| ABL1-phosphorylated           | ABL1               | 100             |
| ABL2                          | ABL2               | 100             |
| ACVR1                         | ACVR1              | 100             |
| ACVR1B                        | ACVR1B             | 91              |
| ACVR2A                        | ACVR2A             | 100             |
| ACVR2B                        | ACVR2B             | 100             |
| ACVRL1                        | ACVRL1             | 100             |
| ADCK3                         | CABC1              | 56              |
| ADCK4                         | ADCK4              | 95              |
| AKT1                          | AKT1               | 3.9             |
| AKT2                          | AKT2               | 65              |
| AKT3                          | AKT3               | 11              |
| ALK                           | ALK                | 21              |
| AMPK-alpha1                   | PRKAA1             | 26              |
| AMPK-alpha2                   | PRKAA2             | 55              |
| ANKK1                         | ANKK1              | 100             |
| ARK5                          | NUAK1              | 27              |
| ASK1                          | MAP3K5             | 100             |
| ASK2                          | MAP3K6             | 100             |
| AURKA                         | AURKA              | 100             |
| AURKB                         | AURKB              | 57              |
| AURKC                         | AURKC              | 56              |
| AXL                           | AXL                | 11              |
| BIKE                          | BMP2K              | 60              |
| BLK                           | BLK                | 43              |
| BMPR1A                        | BMPR1A             | 79              |
| BMPR1B                        | BMPR1B             | 100             |
| BMPR2                         | BMPR2              | 63              |
| BMX                           | BMX                | 92              |
| BRAF                          | BRAF               | 63              |



|               |          |     |
|---------------|----------|-----|
| BRAF(V600E)   | BRAF     | 50  |
| BRK           | PTK6     | 66  |
| BRSK1         | BRSK1    | 70  |
| BRSK2         | BRSK2    | 90  |
| BTK           | BTK      | 76  |
| CAMK1         | CAMK1    | 62  |
| CAMK1D        | CAMK1D   | 11  |
| CAMK1G        | CAMK1G   | 66  |
| CAMK2A        | CAMK2A   | 59  |
| CAMK2B        | CAMK2B   | 67  |
| CAMK2D        | CAMK2D   | 76  |
| CAMK2G        | CAMK2G   | 86  |
| CAMK4         | CAMK4    | 1   |
| CAMKK1        | CAMKK1   | 39  |
| CAMKK2        | CAMKK2   | 48  |
| CASK          | CASK     | 100 |
| CDC2L1        | CDC2L1   | 100 |
| CDC2L2        | CDC2L2   | 100 |
| CDC2L5        | CDC2L5   | 100 |
| CDK11         | CDC2L6   | 100 |
| CDK2          | CDK2     | 48  |
| CDK3          | CDK3     | 42  |
| CDK4-cyclinD1 | CDK4     | 84  |
| CDK4-cyclinD3 | CDK4     | 90  |
| CDK5          | CDK5     | 76  |
| CDK7          | CDK7     | 18  |
| CDK8          | CDK8     | 100 |
| CDK9          | CDK9     | 92  |
| CDKL1         | CDKL1    | 100 |
| CDKL2         | CDKL2    | 74  |
| CDKL3         | CDKL3    | 100 |
| CDKL5         | CDKL5    | 96  |
| CHEK1         | CHEK1    | 15  |
| CHEK2         | CHEK2    | 76  |
| CIT           | CIT      | 95  |
| CLK1          | CLK1     | 4.5 |
| CLK2          | CLK2     | 1.4 |
| CLK3          | CLK3     | 3.4 |
| CLK4          | CLK4     | 11  |
| CSF1R         | CSF1R    | 57  |
| CSK           | CSK      | 89  |
| CSNK1A1       | CSNK1A1  | 19  |
| CSNK1A1L      | CSNK1A1L | 31  |
| CSNK1D        | CSNK1D   | 9.3 |
| CSNK1E        | CSNK1E   | 5.4 |
| CSNK1G1       | CSNK1G1  | 74  |
| CSNK1G2       | CSNK1G2  | 56  |
| CSNK1G3       | CSNK1G3  | 84  |
| CSNK2A1       | CSNK2A1  | 83  |
| CSNK2A2       | CSNK2A2  | 44  |
| CTK           | MATK     | 86  |

|                           |          |      |
|---------------------------|----------|------|
| DAPK1                     | DAPK1    | 20   |
| DAPK2                     | DAPK2    | 50   |
| DAPK3                     | DAPK3    | 18   |
| DCAMKL1                   | DCLK1    | 14   |
| DCAMKL2                   | DCLK2    | 19   |
| DCAMKL3                   | DCLK3    | 1.4  |
| DDR1                      | DDR1     | 94   |
| DDR2                      | DDR2     | 75   |
| DLK                       | MAP3K12  | 52   |
| DMPK                      | DMPK     | 47   |
| DMPK2                     | CDC42BPG | 66   |
| DRAK1                     | STK17A   | 100  |
| DRAK2                     | STK17B   | 100  |
| DYRK1A                    | DYRK1A   | 7    |
| DYRK1B                    | DYRK1B   | 12   |
| DYRK2                     | DYRK2    | 61   |
| EGFR                      | EGFR     | 100  |
| EGFR(E746-A750del)        | EGFR     | 100  |
| EGFR(G719C)               | EGFR     | 97   |
| EGFR(G719S)               | EGFR     | 100  |
| EGFR(L747-E749del, A750P) | EGFR     | 72   |
| EGFR(L747-S752del, P753S) | EGFR     | 90   |
| EGFR(L747-T751del,Sins)   | EGFR     | 88   |
| EGFR(L858R)               | EGFR     | 100  |
| EGFR(L858R,T790M)         | EGFR     | 94   |
| EGFR(L861Q)               | EGFR     | 92   |
| EGFR(S752-I759del)        | EGFR     | 100  |
| EGFR(T790M)               | EGFR     | 41   |
| EIF2AK1                   | EIF2AK1  | 100  |
| EPHA1                     | EPHA1    | 63   |
| EPHA2                     | EPHA2    | 100  |
| EPHA3                     | EPHA3    | 63   |
| EPHA4                     | EPHA4    | 88   |
| EPHA5                     | EPHA5    | 90   |
| EPHA6                     | EPHA6    | 85   |
| EPHA7                     | EPHA7    | 96   |
| EPHA8                     | EPHA8    | 96   |
| EPHB1                     | EPHB1    | 84   |
| EPHB2                     | EPHB2    | 100  |
| EPHB3                     | EPHB3    | 89   |
| EPHB4                     | EPHB4    | 97   |
| EPHB6                     | EPHB6    | 100  |
| ERBB2                     | ERBB2    | 53   |
| ERBB3                     | ERBB3    | 100  |
| ERBB4                     | ERBB4    | 82   |
| ERK1                      | MAPK3    | 98   |
| ERK2                      | MAPK1    | 100  |
| ERK3                      | MAPK6    | 69   |
| ERK4                      | MAPK4    | 100  |
| ERK5                      | MAPK7    | 4.6  |
| ERK8                      | MAPK15   | 0.85 |

|                              |         |      |
|------------------------------|---------|------|
| ERN1                         | ERN1    | 99   |
| FAK                          | PTK2    | 67   |
| FER                          | FER     | 46   |
| FES                          | FES     | 88   |
| FGFR1                        | FGFR1   | 32   |
| FGFR2                        | FGFR2   | 56   |
| FGFR3                        | FGFR3   | 69   |
| FGFR3(G697C)                 | FGFR3   | 69   |
| FGFR4                        | FGFR4   | 79   |
| FGR                          | FGR     | 61   |
| FLT1                         | FLT1    | 100  |
| FLT3                         | FLT3    | 16   |
| FLT3(D835H)                  | FLT3    | 3.7  |
| FLT3(D835Y)                  | FLT3    | 11   |
| FLT3(ITD)                    | FLT3    | 25   |
| FLT3(K663Q)                  | FLT3    | 6    |
| FLT3(N841I)                  | FLT3    | 0.45 |
| FLT3(R834Q)                  | FLT3    | 16   |
| FLT4                         | FLT4    | 54   |
| FRK                          | FRK     | 74   |
| FYN                          | FYN     | 71   |
| GAK                          | GAK     | 64   |
| GCN2(Kin.Dom.2,S808G)        | EIF2AK4 | 78   |
| GRK1                         | GRK1    | 6.1  |
| GRK4                         | GRK4    | 100  |
| GRK7                         | GRK7    | 1.7  |
| GSK3A                        | GSK3A   | 0.2  |
| GSK3B                        | GSK3B   | 0.35 |
| HCK                          | HCK     | 60   |
| HIPK1                        | HIPK1   | 49   |
| HIPK2                        | HIPK2   | 14   |
| HIPK3                        | HIPK3   | 9.6  |
| HIPK4                        | HIPK4   | 90   |
| HPK1                         | MAP4K1  | 61   |
| HUNK                         | HUNK    | 100  |
| ICK                          | ICK     | 21   |
| IGF1R                        | IGF1R   | 60   |
| IKK-alpha                    | CHUK    | 100  |
| IKK-beta                     | IKBKB   | 100  |
| IKK-epsilon                  | IKBKE   | 100  |
| INSR                         | INSR    | 59   |
| INSRR                        | INSRR   | 65   |
| IRAK1                        | IRAK1   | 65   |
| IRAK3                        | IRAK3   | 44   |
| IRAK4                        | IRAK4   | 25   |
| ITK                          | ITK     | 56   |
| JAK1(JH1domain-catalytic)    | JAK1    | 76   |
| JAK1(JH2domain-pseudokinase) | JAK1    | 86   |
| JAK2(JH1domain-catalytic)    | JAK2    | 52   |
| JAK3(JH1domain-catalytic)    | JAK3    | 17   |
| JNK1                         | MAPK8   | 100  |

|                  |          |     |
|------------------|----------|-----|
| JNK2             | MAPK9    | 91  |
| JNK3             | MAPK10   | 67  |
| KIT              | KIT      | 69  |
| KIT(A829P)       | KIT      | 62  |
| KIT(D816H)       | KIT      | 57  |
| KIT(D816V)       | KIT      | 33  |
| KIT(L576P)       | KIT      | 56  |
| KIT(V559D)       | KIT      | 65  |
| KIT(V559D,T670I) | KIT      | 63  |
| KIT(V559D,V654A) | KIT      | 88  |
| LATS1            | LATS1    | 79  |
| LATS2            | LATS2    | 20  |
| LCK              | LCK      | 82  |
| LIMK1            | LIMK1    | 100 |
| LIMK2            | LIMK2    | 100 |
| LKB1             | STK11    | 75  |
| LOK              | STK10    | 59  |
| LRRK2            | LRRK2    | 100 |
| LRRK2(G2019S)    | LRRK2    | 100 |
| LTK              | LTK      | 44  |
| LYN              | LYN      | 92  |
| LZK              | MAP3K13  | 100 |
| MAK              | MAK      | 100 |
| MAP3K1           | MAP3K1   | 86  |
| MAP3K15          | MAP3K15  | 100 |
| MAP3K2           | MAP3K2   | 42  |
| MAP3K3           | MAP3K3   | 26  |
| MAP3K4           | MAP3K4   | 100 |
| MAP4K2           | MAP4K2   | 100 |
| MAP4K3           | MAP4K3   | 7.6 |
| MAP4K4           | MAP4K4   | 78  |
| MAP4K5           | MAP4K5   | 56  |
| MAPKAPK2         | MAPKAPK2 | 100 |
| MAPKAPK5         | MAPKAPK5 | 100 |
| MARK1            | MARK1    | 98  |
| MARK2            | MARK2    | 36  |
| MARK3            | MARK3    | 56  |
| MARK4            | MARK4    | 90  |
| MAST1            | MAST1    | 100 |
| MEK1             | MAP2K1   | 85  |
| MEK2             | MAP2K2   | 81  |
| MEK3             | MAP2K3   | 1.7 |
| MEK4             | MAP2K4   | 100 |
| MEK5             | MAP2K5   | 91  |
| MEK6             | MAP2K6   | 82  |
| MELK             | MELK     | 78  |
| MERTK            | MERTK    | 5.4 |
| MET              | MET      | 56  |
| MET(M1250T)      | MET      | 27  |
| MET(Y1235D)      | MET      | 54  |
| MINK             | MINK1    | 72  |

|           |          |     |
|-----------|----------|-----|
| MKK7      | MAP2K7   | 83  |
| MKMK1     | MKMK1    | 97  |
| MKMK2     | MKMK2    | 85  |
| MLCK      | MYLK3    | 100 |
| MLK1      | MAP3K9   | 62  |
| MLK2      | MAP3K10  | 84  |
| MLK3      | MAP3K11  | 58  |
| MRCKA     | CDC42BPA | 96  |
| MRCKB     | CDC42BPB | 61  |
| MST1      | STK4     | 14  |
| MST1R     | MST1R    | 80  |
| MST2      | STK3     | 22  |
| MST3      | STK24    | 79  |
| MST4      | MST4     | 3.4 |
| MTOR      | FRAP1    | 100 |
| MUSK      | MUSK     | 100 |
| MYLK      | MYLK     | 3.1 |
| MYLK2     | MYLK2    | 90  |
| MYLK4     | MYLK4    | 90  |
| MYO3A     | MYO3A    | 70  |
| MYO3B     | MYO3B    | 93  |
| NDR1      | STK38    | 14  |
| NDR2      | STK38L   | 18  |
| NEK1      | NEK1     | 71  |
| NEK11     | NEK11    | 100 |
| NEK2      | NEK2     | 68  |
| NEK3      | NEK3     | 79  |
| NEK4      | NEK4     | 100 |
| NEK5      | NEK5     | 100 |
| NEK6      | NEK6     | 100 |
| NEK7      | NEK7     | 100 |
| NEK9      | NEK9     | 99  |
| NIM1      | MGC42105 | 100 |
| NLK       | NLK      | 61  |
| OSR1      | OXR1     | 76  |
| p38-alpha | MAPK14   | 100 |
| p38-beta  | MAPK11   | 76  |
| p38-delta | MAPK13   | 81  |
| p38-gamma | MAPK12   | 100 |
| PAK1      | PAK1     | 34  |
| PAK2      | PAK2     | 18  |
| PAK3      | PAK3     | 34  |
| PAK4      | PAK4     | 48  |
| PAK6      | PAK6     | 54  |
| PAK7      | PAK7     | 29  |
| PCK1      | PCK1     | 94  |
| PCK2      | PCK2     | 98  |
| PCK3      | PCK3     | 100 |
| PDGFRA    | PDGFRA   | 80  |
| PDGFRB    | PDGFRB   | 17  |
| PDPK1     | PDPK1    | 84  |

|                       |             |     |
|-----------------------|-------------|-----|
| PFCDPK1(P.falciparum) | PFB0815w    | 100 |
| PFPK5(P.falciparum)   | MAL13P1.279 | 73  |
| PFTAIRE2              | PFTK2       | 43  |
| PFTK1                 | PFTK1       | 100 |
| PHKG1                 | PHKG1       | 79  |
| PHKG2                 | PHKG2       | 33  |
| PIK3C2B               | PIK3C2B     | 100 |
| PIK3C2G               | PIK3C2G     | 100 |
| PIK3CA                | PIK3CA      | 100 |
| PIK3CA(C420R)         | PIK3CA      | 100 |
| PIK3CA(E542K)         | PIK3CA      | 100 |
| PIK3CA(E545A)         | PIK3CA      | 98  |
| PIK3CA(E545K)         | PIK3CA      | 100 |
| PIK3CA(H1047L)        | PIK3CA      | 100 |
| PIK3CA(H1047Y)        | PIK3CA      | 100 |
| PIK3CA(I800L)         | PIK3CA      | 91  |
| PIK3CA(M1043I)        | PIK3CA      | 100 |
| PIK3CA(Q546K)         | PIK3CA      | 100 |
| PIK3CB                | PIK3CB      | 58  |
| PIK3CD                | PIK3CD      | 80  |
| PIK3CG                | PIK3CG      | 96  |
| PIK4CB                | PI4KB       | 100 |
| PIM1                  | PIM1        | 1.6 |
| PIM2                  | PIM2        | 4.8 |
| PIM3                  | PIM3        | 2   |
| PIP5K1A               | PIP5K1A     | 73  |
| PIP5K1C               | PIP5K1C     | 16  |
| PIP5K2B               | PIP4K2B     | 100 |
| PIP5K2C               | PIP4K2C     | 100 |
| PKAC-alpha            | PRKACA      | 12  |
| PKAC-beta             | PRKACB      | 11  |
| PKMYT1                | PKMYT1      | 66  |
| PKN1                  | PKN1        | 3   |
| PKN2                  | PKN2        | 11  |
| PKNB(M.tuberculosis)  | pknB        | 16  |
| PLK1                  | PLK1        | 95  |
| PLK2                  | PLK2        | 100 |
| PLK3                  | PLK3        | 100 |
| PLK4                  | PLK4        | 47  |
| PRKCD                 | PRKCD       | 2.2 |
| PRKCE                 | PRKCE       | 17  |
| PRKCH                 | PRKCH       | 6   |
| PRKCI                 | PRKCI       | 57  |
| PRKCQ                 | PRKCQ       | 2.4 |
| PRKD1                 | PRKD1       | 54  |
| PRKD2                 | PRKD2       | 65  |
| PRKD3                 | PRKD3       | 29  |
| PRKG1                 | PRKG1       | 62  |
| PRKG2                 | PRKG2       | 16  |
| PRKR                  | EIF2AK2     | 28  |
| PRKX                  | PRKX        | 54  |

|                               |          |     |
|-------------------------------|----------|-----|
| PRP4                          | PRPF4B   | 100 |
| PYK2                          | PTK2B    | 74  |
| QSK                           | KIAA0999 | 100 |
| RAF1                          | RAF1     | 94  |
| RET                           | RET      | 5.4 |
| RET(M918T)                    | RET      | 1.9 |
| RET(V804L)                    | RET      | 10  |
| RET(V804M)                    | RET      | 12  |
| RIOK1                         | RIOK1    | 100 |
| RIOK2                         | RIOK2    | 87  |
| RIOK3                         | RIOK3    | 100 |
| RIPK1                         | RIPK1    | 100 |
| RIPK2                         | RIPK2    | 100 |
| RIPK4                         | RIPK4    | 100 |
| RIPK5                         | DSTKY    | 77  |
| ROCK1                         | ROCK1    | 1.1 |
| ROCK2                         | ROCK2    | 8.4 |
| ROS1                          | ROS1     | 40  |
| RPS6KA4(Kin.Dom.1-N-terminal) | RPS6KA4  | 12  |
| RPS6KA4(Kin.Dom.2-C-terminal) | RPS6KA4  | 100 |
| RPS6KA5(Kin.Dom.1-N-terminal) | RPS6KA5  | 36  |
| RPS6KA5(Kin.Dom.2-C-terminal) | RPS6KA5  | 100 |
| RSK1(Kin.Dom.1-N-terminal)    | RPS6KA1  | 29  |
| RSK1(Kin.Dom.2-C-terminal)    | RPS6KA1  | 62  |
| RSK2(Kin.Dom.1-N-terminal)    | RPS6KA3  | 2.6 |
| RSK3(Kin.Dom.1-N-terminal)    | RPS6KA2  | 18  |
| RSK3(Kin.Dom.2-C-terminal)    | RPS6KA2  | 89  |
| RSK4(Kin.Dom.1-N-terminal)    | RPS6KA6  | 4.4 |
| RSK4(Kin.Dom.2-C-terminal)    | RPS6KA6  | 34  |
| S6K1                          | RPS6KB1  | 25  |
| SBK1                          | SBK1     | 84  |
| SgK110                        |          | 100 |
| SGK3                          | SGK3     | 58  |
| SIK                           | SIK1     | 93  |
| SIK2                          | SIK2     | 70  |
| SLK                           | SLK      | 42  |
| SNARK                         | NUAK2    | 16  |
| SNRK                          | SNRK     | 100 |
| SRC                           | SRC      | 70  |
| SRMS                          | SRMS     | 85  |
| SRPK1                         | SRPK1    | 100 |
| SRPK2                         | SRPK2    | 93  |
| SRPK3                         | SRPK3    | 100 |
| STK16                         | STK16    | 57  |
| STK33                         | STK33    | 11  |
| STK35                         | STK35    | 62  |
| STK36                         | STK36    | 89  |
| STK39                         | STK39    | 100 |
| SYK                           | SYK      | 92  |
| TAK1                          | MAP3K7   | 35  |
| TAOK1                         | TAOK1    | 5.8 |

|                              |        |     |
|------------------------------|--------|-----|
| TAOK2                        | TAOK2  | 40  |
| TAOK3                        | TAOK3  | 10  |
| TBK1                         | TBK1   | 100 |
| TEC                          | TEC    | 100 |
| TESK1                        | TESK1  | 100 |
| TGFBR1                       | TGFBR1 | 100 |
| TGFBR2                       | TGFBR2 | 100 |
| TIE1                         | TIE1   | 63  |
| TIE2                         | TEK    | 92  |
| TLK1                         | TLK1   | 41  |
| TLK2                         | TLK2   | 91  |
| TNIK                         | TNIK   | 65  |
| TNK1                         | TNK1   | 52  |
| TNK2                         | TNK2   | 100 |
| TNNI3K                       | TNNI3K | 79  |
| TRKA                         | NTRK1  | 26  |
| TRKB                         | NTRK2  | 18  |
| TRKC                         | NTRK3  | 36  |
| TRPM6                        | TRPM6  | 82  |
| TSSK1B                       | TSSK1B | 100 |
| TTK                          | TTK    | 72  |
| TXK                          | TXK    | 100 |
| TYK2(JH1domain-catalytic)    | TYK2   | 93  |
| TYK2(JH2domain-pseudokinase) | TYK2   | 100 |
| TYRO3                        | TYRO3  | 92  |
| ULK1                         | ULK1   | 0.2 |
| ULK2                         | ULK2   | 7   |
| ULK3                         | ULK3   | 100 |
| VEGFR2                       | KDR    | 75  |
| VRK2                         | VRK2   | 9.5 |
| WEE1                         | WEE1   | 100 |
| WEE2                         | WEE2   | 85  |
| YANK1                        | STK32A | 43  |
| YANK2                        | STK32B | 68  |
| YANK3                        | STK32C | 92  |
| YES                          | YES1   | 52  |
| YSK1                         | STK25  | 43  |
| YSK4                         | YSK4   | 0.2 |
| ZAK                          | ZAK    | 100 |
| ZAP70                        | ZAP70  | 100 |

---



## 4. References

- 1) M. Lin, X. Xu, J. Wang, N. Chen, J. Huang, *Chin. J. Synth. Chem.* **2005**, *13*, 169-171.
- 2) A. G. Wenzel, E. N. Jacobsen, *J. Am. Chem. Soc.* **2002**, *124*, 12964-12965.
- 3) L. Spek, *PLATON, A Multipurpose Crystallographic Tool*; Utrecht University, Utrecht, The Netherlands, 1998.
- 4) M. C. Burla, R. Caliandro, M. Camalli, B. Carrozzini, G. L. Casciarano, L. De Caro, C. Giacovazzo, G. Polidori, D. Siliqi, R. Spagna, *J. Appl. Cryst.* **2007**, *40*, 609-613.
- 5) G. M. Sheldrick, *Acta Cryst. A* **2008**, *64*, 112-122.
- 6) M. A. Fabian, W. H. Biggs III, D. K. Treiber, C. E. Atteridge, M. D. Azimioara, M. G. Benedetti, T. A. Carter, P. Ciceri, P. T. Edeen, M. Floyd, J. M. Ford, M. Galvin, J. L. Gerlach, R. M. Grotzfeld, S. Herrgard, D. E. Insko, A. G. Lai, J.-M. Lélias, S. A. Mehta, Z. V. Milanov, A. M. Velasco, L. M. Wodicka, H. K. Patel, P. P. Zarrinkar, D. J. Lockhardt, *Nat. Biotechnol.* **2005**, *23*, 329-336.
- 7) M. W. Karaman, S. Herrgard, D. K. Treiber, P. Gallant, C. E. Atteridge, B. T. Campbell, K. W. Chan, P. Ciceri, M. I. Davis, P. T. Edeen, R. Faraoni, M. Floyd, J. P. Hunt, D. J. Lockhardt, Z. V. Milanov, M. J. Morrison, G. Pallares, H. K. Patel, S. Pritchard, L. M. Wodicka, P. P. Zarrinkar, *Nat. Biotechnol.* **2008**, *26*, 127-132.
